# Supplementary material for: Resources, support, and integration as potential barriers and facilitators to the implementation of blended therapy in the routine care of inpatients: a qualitative study
Source: PubMed Central journal article supplement (PMC11687372; doi:10.3389/fpsyt.2024.1417784), 2024-12-17
Supplement: DataSheet1.pdf [file DataSheet1.pdf]

# Supplement

## 1. Interview guide in German

### 1.1 Questions for health care provider

#### Questions about resources

- Wie veränderte sich Ihre tägliche Stationsarbeit durch die Arbeit mit der e-Mental Health Plattform? Welchen Einfluss hatte dies auf Ihre zeitlichen Ressourcen?
- Fakultativ: Mit welchem Mitteln wurde einer allfälligen Mehrbelastung entgegengewirkt?
- Was von Ihrer vorbestehenden Arbeit könnte allenfalls ersetzt werden bzw. weglassen werden durch die Anwendung von Minddistrict?
- Welche Anpassungen könnten vorgenommen werden, damit es zu einer (zusätzlichen) Erleichterung Ihrer klinischen Tätigkeit kommt?

#### Questions about support

- Welche Unterstützung und Anleitungen haben Sie bei Ihrer Arbeit mit der e-Mental Health Plattform erhalten? Gab es interne Guidelines, Supervisionen oder Ansprechpartner auf der Station, wenn es zu Schwierigkeiten oder Fragen zu der Anwendung kam?
- Was war bei den vorhandenen Unterstützungsmöglichkeiten gut? Was hatte Ihnen gefehlt?
- Was würden Sie sich als zusätzliche Unterstützung in der Zukunft wünschen?

#### Questions about integration

- Wie wurden die Inhalte der e-Mental Health Plattform in die face-to-face Therapie eingebaut?
- Welche Anpassungen erfolgten bezüglich der Dauer der Einzelgespräche, der Inhalte oder der Anzahl Therapiesitzungen?
- Wie wurden mit den Inhalten der e-Mental Health Plattform umgegangen im Team? Wie erfolgte der interprofessionelle Austausch mit beispielsweise dem Pflegeperson/Therapeuten?
- Welche Aspekte der Integration in die Einzelgespräche und in das interprofessionelle Team haben gut funktioniert? Was hat Ihnen gefehlt?
- Auf was sollte in der Zukunft bei der Integration geachtet werden?

#### Closing questions

- Wie schätzen Sie im generellen das zukünftige Potential von Therapien mittels digitaler Hilfsmittel ein?
- Sehen Sie Möglichkeiten wie die e-Mental Health Plattform vor oder nach dem stationären Aufenthalt sinnvoll eingesetzt werden könnte?
- Würden Sie gerne (wieder) vermehrt die BT im stationären Rahmen einbauen?

### 1.2 Questions for patients

#### Questions about resources

- Wie veränderte sich Ihr Alltag auf der Station durch die Arbeit an der e-Mental Health Plattform neben dem bevorstehenden Therapieprogramm?
- Wann habe Sie an den Modulen gearbeitet und wie haben Sie dies in Ihren Alltag eingeplant? Wie hat das für Sie funktioniert?
- Welche Therapieelemente im Stationsprogramm könnten allenfalls aufgrund der Arbeit mit den Modulen ersetzt bzw. weggelassen werden könnten?
- Wie sollten die Module aus Ihrer Sicht idealerweise in das Therapieprogrammen bzw. in Ihren Alltag integriert werden?

#### Questions about support

- Welche Unterstützung und Anleitungen haben Sie bei Ihrer Arbeit mit den Modulen auf der e-Mental Health Plattform erhalten?

- Was war bei den vorhandenen Möglichkeiten gut? Was hat Ihnen gefehlt?
- Was würden Sie sich als zusätzliche Unterstützung in der Zukunft wünschen?

#### Questions about integration

- Inwiefern haben die Module der e-Mental Health Plattform in Ihr übriges Therapieprogramm gepasst?
- Wie wurden die Inhalte der e-Mental Health Plattform in die anderen Therapien, beispielsweise in den Einzel- und Gruppentherapien, eingebaut?
- Welche Aspekte der Integration haben gut funktioniert? Was hat Ihnen gefehlt?
- Auf was sollte in der Zukunft bei der Integration geachtet werden?

#### Closing questions

- Wie schätzen Sie generell das zukünftige Potential von Therapien mittels digitaler Hilfsmittel ein?
- Sehen Sie Möglichkeiten wie die e-Mental Health Plattform vor oder nach dem stationären Aufenthalt sinnvoll eingesetzt werden könnte?
- Falls es erneut zu einem stationären Eintritt kommen sollte, würde Sie gerne wieder diese e-Mental Health Plattform nutzen?

## **2. Interview guide in English**

### **2.1 Questions for health care provider**

#### Questions about resources

- How did your daily work at the clinical change with the addition of the e-mental health platform?
- What impact did this have on your time resources / time management?
- Facultative: What could counteract the additional load of work?
- What of your preexisting work could be replaced and thereby omitted by the usage of Minddistrict?
- What adjustments would be necessary to make to (additionally) facilitate your clinical work?

#### Questions about support

- What support and guidance have you received in your work with the e-mental health platform? Were there internal guidelines, supervisions, or contacts on the clinical ward when difficulties or questions arose in using the e-mental health platform?
- What was good about the support options available? What was missing?
- What would you like to have as additional support in the future?

#### Questions about integration

- How was the e-mental health platform content integrated into the face-to-face therapy with patients?
- What adjustments were successfully made in terms of the duration of individual sessions, its content, or the number of sessions?
- How was the content of the e-mental health platform handled in the team working together? How was the interprofessional exchange for example with the nurses/therapists?
- What aspects of the integration into the individual sessions and into the interprofessional team worked well? What was missing for you?
- What should be considered in the future regarding the integration?

#### Closing questions:

- How do you estimate the potential of using digital aid for future therapies?
- How could the e-mental health platform be meaningfully used before or after an inpatient's stay? What possibilities do you see?
- Would you like to incorporate more BT in the routine care of inpatients?

## 2.2 Questions for patients

### Questions about resources

- How did your daily life at the clinical ward change with the work on the e-mental health platform modules alongside with the pre-existing therapy program?
- When did you work on the modules and how did you schedule this into your daily routine? How did it work for you?
- Which elements of the therapeutic program on the ward can be replaced by the work with the modules and which elements could thus be omitted?
- From your perspective, how should the modules ideally be integrated into the therapy program or into your daily life at the hospital?

### Questions about support

- What support and guidance did you receive when working with the modules of the e-mental health platform?
- What was good about the support options available? What was missing for you?
- What would you like to have as additional support in the future?

### Questions about integration

- To what extent did the modules of the e-mental health platform fit into the rest of your therapy program?
- How was the content of the e-mental health platform integrated into your other therapies, such as individual and group therapies?
- What aspects of the integration worked well? What was missing for you?
- What should be considered in the future regarding the integration?

### Closing questions

- How do you estimate the potential of using digital aid for future therapies?
- How could the e-mental health platform be meaningfully used before or after an inpatient's stay? What possibilities do you see?
- If you were to be an inpatient at a hospital again, would you like to use this e-mental health platform again?

### 3. Tables result

**Table 1**  
Therapist perspectives (category system)

| Main themes<br>Subthemes                             | N therapists<br>(%) |
|------------------------------------------------------|---------------------|
| <b>Time resources</b>                                |                     |
| • Extra effort                                       | 9 (81.8)            |
| • Introduction time                                  | 2 (18.2)            |
| • Time adjustments needed                            | 6 (54.5)            |
| • No time overload                                   | 2 (18.2)            |
| • Time saved                                         | 2 (18.2)            |
| ○ Covid pandemic                                     | 3 (27.3)            |
| <b>Support and organization</b>                      |                     |
| • Missing centralization or clear concept            | 10 (90.9)           |
| • Lack of resources                                  | 5 (45.5)            |
| • Sufficient initial training                        | 8 (72.7)            |
| • Good technical support with contact person         | 5 (45.5)            |
| • Experienced person in charge (superuser)           | 3 (27.3)            |
| • Overview of the platform contents                  | 2 (18.2)            |
| • Wish for overview and “which fits who” guideline   | 2 (18.2)            |
| • Need for ongoing support, training, and monitoring | 2 (18.2)            |
| • Lack of knowledge of how to give feedback          | 2 (18.2)            |
| • Interprofessional exchange existing                | 4 (36.4)            |
| • No interprofessional exchanges existing            | 7 (63.6)            |
| ○ Not implemented enough                             | 2 (18.2)            |
| ○ Contents too therapeutic                           | 1 (9.1)             |
| <b>Integration</b>                                   |                     |
| • Good supplement                                    | 10 (90.9)           |
| • Therapy replacement                                | 9 (81.8)            |
| ○ For psychoeducation                                | 9 (81.8)            |
| ○ For mindfulness exercises                          | 3 (27.3)            |
| ○ For skill training                                 | 2 (18.2)            |

- No therapy replacement 3 (27.3)
- Consumption warning 1 (9.1)
- Punctually or briefly integrated 11 (100)
- Possible integration adjustments 3 (27.3)
- Wish to select adapted contents 2 (18.2)
- Offer too broad 4 (36.4)
- Wish for broader offer 2 (18.2)
- Wish for inward-specific modules 1 (9.1)
- Expand to other functionalities 1 (9.1)
- Digitalization seen as inevitable 1 (9.1)
- Too new / too unknown 1 (9.1)
- Not adapted to all patients 5 (45.5)

### **Sequential BT**

- Not adapted or necessary for inward 6 (54.5)
  - More meaningful or several advantages with outpatients 5 (45.5)
  - Missing resources with outpatients 1 (9.1)
- Before the stay in hospital*
- Access to platform before stay viewed as positive 3 (27.3)
  - Idea to give patients information to prepare before admission 2 (18.2)
  - Not recommendable to assign modules without knowledge of patient 5 (45.5)
- After the stay in hospital*
- Positive to use after stay as transition 8 (72.7)
  - Wanting a clear end the inward treatment with discharge 2 (18.2)

**Table 2**

Patient's perspectives (category system)

| Main themes<br>Subthemes                                  | N patients<br>(%) |
|-----------------------------------------------------------|-------------------|
| <b>Time resources</b>                                     |                   |
| • Usage in free time                                      | 6 (100)           |
| • Not scheduled when to use                               | 5 (83.3)          |
| • No time overload                                        | 3 (50)            |
| • Not seen mandatory                                      | 3 (50)            |
| • Time adjustments required if it should be mandatory     | 2 (33.3)          |
| • Stressful if it should be mandatory                     | 1 (16.7)          |
| • Exiting pressure to be "up to date"                     | 1 (16.7)          |
| <b>Support and organization</b>                           |                   |
| • Support and guidance available by responsible therapist | 3 (50)            |
| • Satisfied with existing support and guidance            | 4 (66.7)          |
| • Frequency of usage unclear                              | 1 (16.7)          |
| • Platform seen as clear, intuitive, and self-explanatory | 5 (83.3)          |
| <b>Integration</b>                                        |                   |
| • Good as a supplement                                    | 6 (100)           |
| • Therapy replacement possible                            | 1 (16.7)          |
| • No replacement of therapy possible                      | 5 (83.3)          |
| • Contents were not integrated                            | 5 (83.3)          |
| • Could be more embedded in f2f                           | 2 (33.3)          |
| • Viewed as part of therapy program (integrated)          | 1 (16.7)          |
| • Contents fit to therapy                                 | 4 (66.7)          |
| • Contents nothing new                                    | 1 (16.7)          |
| • Contents viewed as not matching                         | 1 (16.7)          |
| • Different language version needed of some modules       | 1 (16.7)          |
| • Wish to work more independently                         | 1 (16.7)          |
| • Positive outlook towards digitalization                 | 4 (66.7)          |
| • Importance to adopt right attitude for the use of BT    | 1 (16.7)          |

## Sequential BT

- Wish not to use their own phone during stay / recommend extra device 1 (16.7)

### *Before the stay in hospital*

- Strange to receive module before admission 3 (27.3)
- Wish for more information on symptoms before admission 1 (16.7)

### *After the stay in hospital*

- Would continue using after discharge 2 (33.3)
